# Supplementary material
Source: Research Square preprint supplement (doi:10.21203/rs.3.rs-10006895/v1)
Supplement: Supplementary file 1 [file 7c272714ac8feaef6823bf10.docx]

**Supporting Materials**

**A Chromene-Based Fluorescent Probe for Rapid Hypochlorite Detection in Environmental Matrices, Plant Tissues, and a Smartphone Platform**

Guangqin Gao1, Baixue Zhao2, Yuli Dang1, Wenbo Shen1, Zhanqi Cao1, Chenyu Li1, Rubing Feng1, Puhui Xie1*, Fengqi Guo3*

1College of Sciences, Henan Agricultural University, Zhengzhou 450002, P. R. China

2 College of Forestry,Henan Agricultural University, Zhengzhou 450046, P. R. China

3College of Ecology and Environment, Zhengzhou University, 450001, P. R. China

**Fig. S1** Absorption spectra of **1** at pH 4–10.

**Fig. S2** Fluorescence spectra of **1** (10 μM) in the presence of ClO− (10 eq) at pH 4–10.

**Fig. S3** Time dependence for fluorescence intensity at 530 nm of **1** (10 μM) in the presence of ClO− (10 eq).


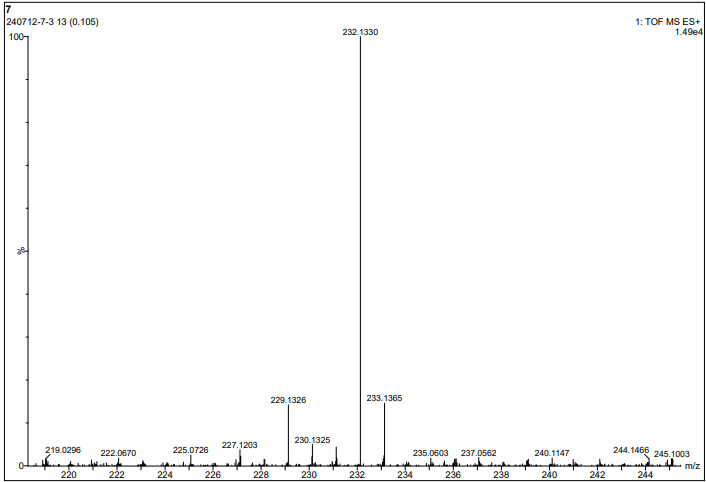


**Fig. S4** MS of **1** + ClO−.

**Fig. S5** Absorption spectra of **1** + ClO− and **1A.**

**Fig. S6** Lifetime profiles of **1** and **1** + ClO−.

**
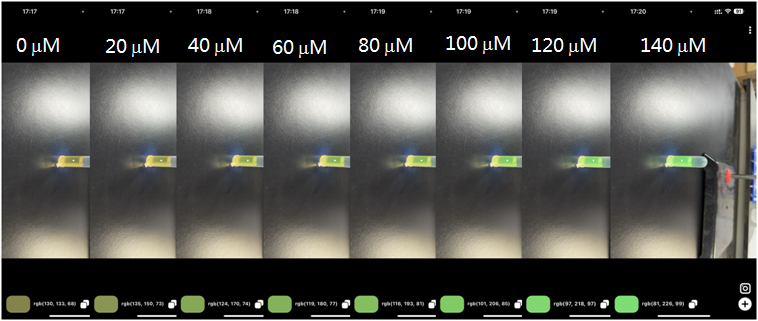
**

**Fig. S7** Digitized RGB information of **1** (10μM) in presence of ClO− (0–140 μM) based on smartphone platform.

**Table S1** The collected RGB values, calculated Euclidean distance and the corresponding ClO− concentration.

| C(ClO−/μM) | R | G | B | Euclidean distance | |
| --- | --- | --- | --- | --- | --- |
| 0 | 130 | 133 | 68 | 0 |
| 20 | 135 | 150 | 73 | 18.4120 |
| 40 | 124 | 170 | 74 | 37.9605 |
| 60 | 119 | 180 | 77 | 49.1019 |
| 80 | 116 | 193 | 81 | 62.9683 |
| 100 | 101 | 206 | 85 | 80.3679 |
| 120 | 97 | 218 | 97 | 95.6818 |
| 140 | 81 | 226 | 99 | 109.5947 |
