# Supplementary material
Source: Research Square preprint supplement (doi:10.21203/rs.3.rs-10006895/v1)

**Table 1** Cross-checking of the present probe with other fluorescence works for the detection of ClO−.


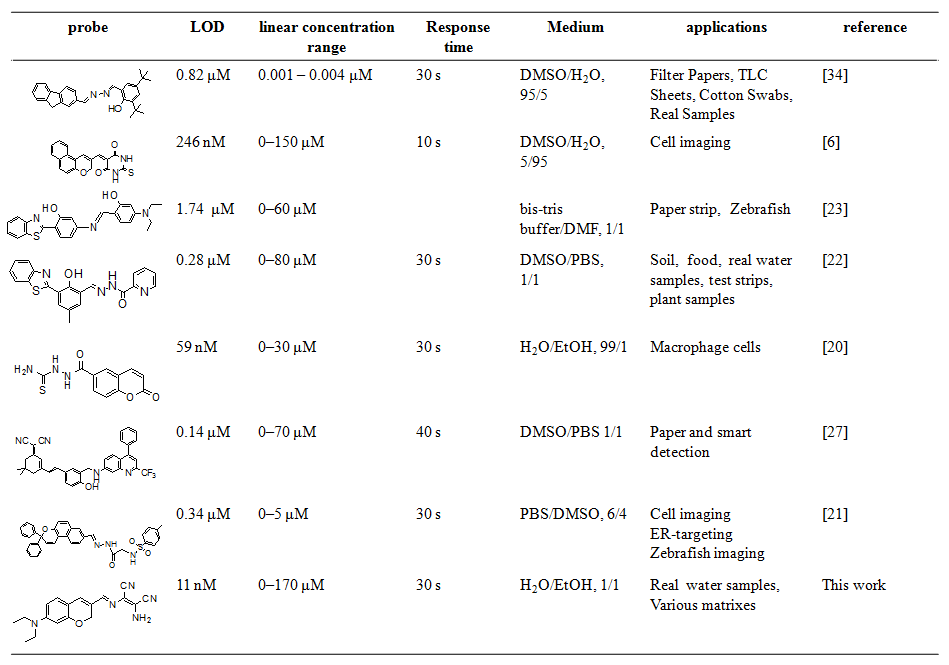

Supplement: Supplementary file 2 [file bfc0ba0433ca812d14fcce32.docx]
