# Supplementary material
Source: Research Square preprint supplement (doi:10.21203/rs.3.rs-10006895/v1)
Supplement: Supplementary file 3 [file dc2c488b043594c926a8f953.docx]

**Scheme 1** Design of **1** toward interaction with ClO−.
